# Supplementary material
Source: PubMed Central journal article supplement (PMC5074623)
Supplement: supp_pp.16.00789_PP2015-01819DR1_Supplemental_Materialfigstblsmeth.pdf [file supp_pp.16.00789_PP2015-01819DR1_Supplemental_Materialfigstblsmeth.pdf]

## Genome-wide identification of target genes regulated by OsMADS1 during rice floret development reveals its DNA recognition properties

Imtiyaz Khanday<sup>2, 3</sup>, Sanjukta Das<sup>2</sup>, Grace L Chongloi<sup>2</sup>, Manju Bansal, Ueli Grossniklaus and Usha Vijayraghavan\*

Department of Microbiology and Cell Biology, Indian Institute of Science, Bangalore 560012, India (I. K., G.L.C., U. V.); b Molecular Biophysics Unit, Indian Institute of Science, Bangalore 560012, India (S. D., M. B.) and Department of Plant and Microbial Biology & Zurich-Basel Plant Science Center, University of Zurich, Zurich 8008, Switzerland (U. G.).

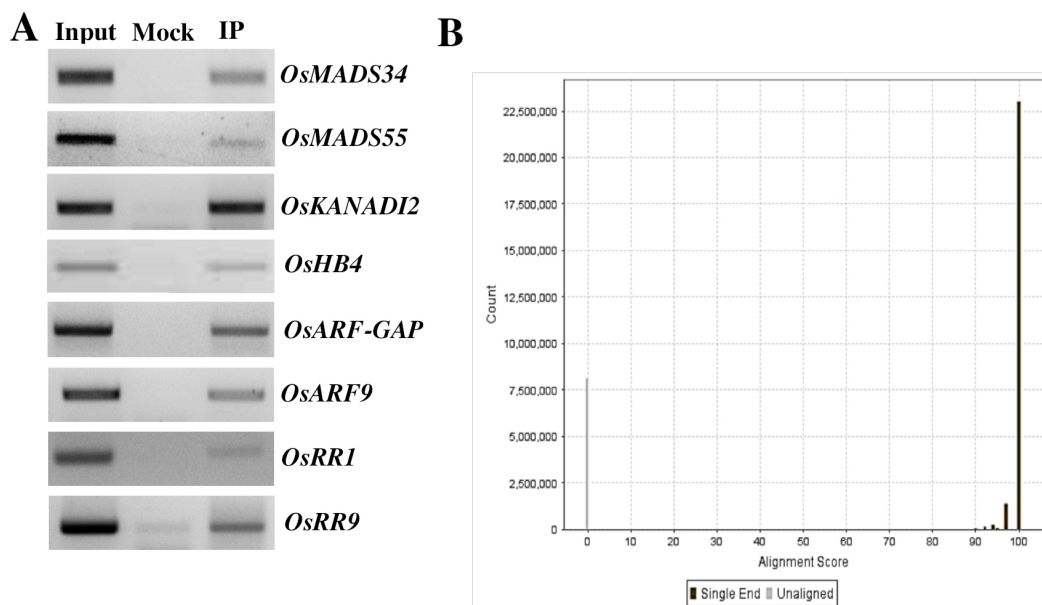

**Supplemental Figure S1.** Quality assurance of OsMADS1 immuno-precipitated sample and mapping of the ChIP-seq reads. **A**, Chromatin pooled from 8 independent ChIP experiments were demonstrated for efficient OsMADS1 binding on eight loci previously reported by Khanday et al. (2013) to be gene targets of OsMADS1. **B**, Roughly 32 million reads, obtained after the sequencing of immuno-precipitated DNA with anti-OsMADS1 antibody, are mapped to rice reference genome. Y-axis shows the number of reads and X-axis shows the alignment score. About 23 million reads mapped uniquely to rice genome with 100% identity.

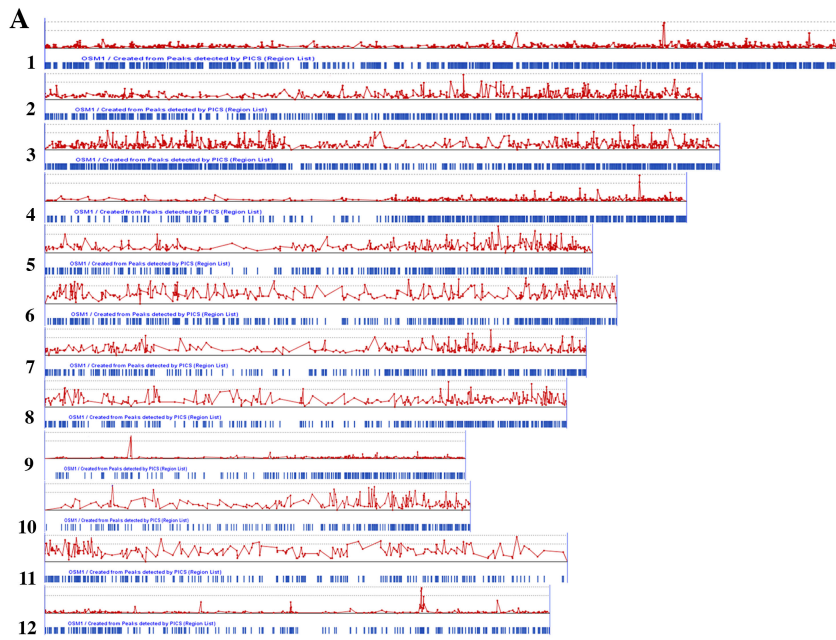

**B**

| Chromosome | Number of peaks | Size of chromosome in Mb | Number of peaks per Mb |
|------------|-----------------|--------------------------|------------------------|
| Chr01      | 602             | 45.0                     | 13.4                   |
| Chr02      | 412             | 36.8                     | 11.2                   |
| Chr03      | 465             | 37.3                     | 12.5                   |
| Chr04      | 279             | 36.1                     | 7.7                    |
| Chr05      | 234             | 30.1                     | 7.8                    |
| Chr06      | 203             | 32.1                     | 6.3                    |
| Chr07      | 214             | 30.4                     | 7.1                    |
| Chr08      | 199             | 28.5                     | 7.0                    |
| Chr09      | 174             | 23.9                     | 7.3                    |
| Chr10      | 139             | 23.7                     | 5.9                    |
| Chr11      | 105             | 31.2                     | 3.4                    |
| Chr12      | 144             | 27.7                     | 5.2                    |

**Supplemental Figure S2.** Genomic view of OsMADS1 peaks and density of OsMADS1 binding sites. **A**, Genomic view of OsMADS1 peaks. **B**, Density of OsMADS1 binding peaks per Mb of DNA across the twelve chromosomes of rice

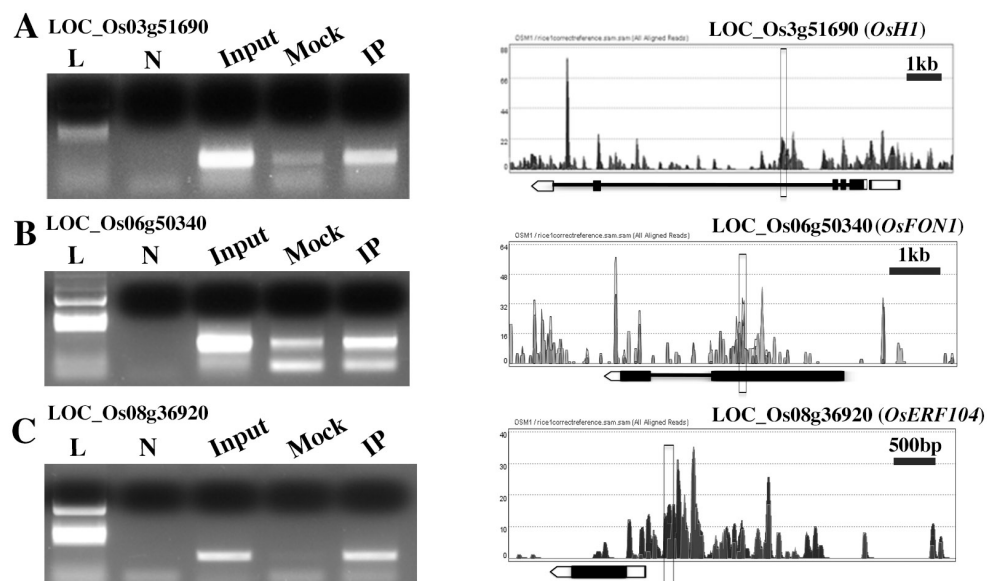

**Supplemental Figure S3.** Semi-quantitative PCR validation for some additional OsMADS1 ChIP-seq binding sites. OsMADS1 binding on 3<sup>rd</sup> Intron of *OsHI* (**A**), 1<sup>st</sup> exon of *OsFONI* (**B**) and upstream sequences of *OsERF104* (**C**). On the horizontal (X-axis) gene structure, black boxes are exons while black lines indicate introns. White boxes represent UTRs whereas the white pentagon (3' UTR) indicates orientation of the gene. Vertical (Y-axis) grey unfilled boxes depict the region assessed by ChIP- PCR analyses. L - *HinfI* restricted pBluescript KS DNA ladder, N- negative control PCR with no template.

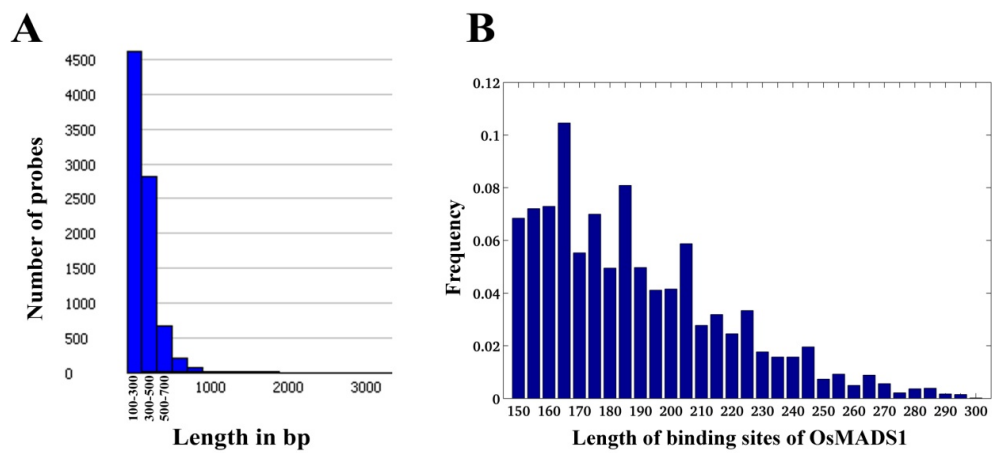

**Supplemental Figure S4.** Length of OsMADS1-bound sequences in the genome. **A**, Histogram showing the length of contigs of genomic sequence reads that are OsMADS1-bound. The majority (57%) of binding sites encompass 100-300 bp of chromosomal sequences while the rest can span from 300-500 bp with a very minor set going up to 1 kb. **B**, A DNA length frequency histogram for binding sites ranging between 150-300 bp. The predominant coverage of OsMADS1 binding sites is between 160 to 190 bp.

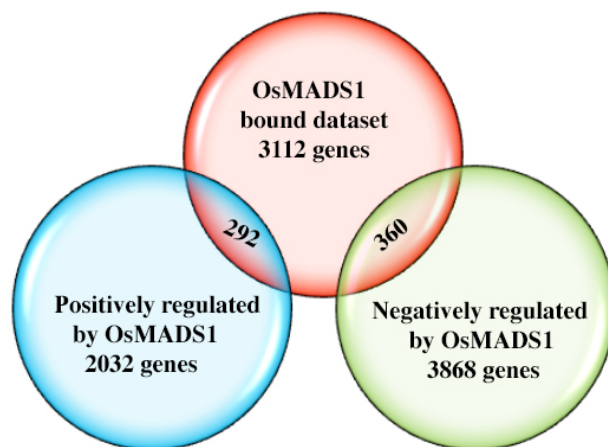

**Supplemental Figure S5.** Overlap of OsMADS1-bound gene loci with genes whose expression is modulated by OsMADS1. Red circle represents gene-associated loci from OsMADS1 ChIP-seq data set. This gene set was compared with gene expression data sets consisting of genes that are up-regulated or down-regulated in young florets of 2 to 20 mm *OsMADS1*RNAi panicles as compared to similarly staged wild-type panicles, Khanday et al. (2013). These genes with altered expression are represented in green and blue circles respectively. A total of 652 genes are directly regulated by OsMADS1, of which we deduce, 292 are directly and positively regulated by OsMADS1 while 360 are directly and negatively regulated by *OsMADS1* in wild-type panicles.

**Supplementary Table S1:** List of primers used for ChIP-PCR and gene expression studies.

The TIGR Locus ID and corresponding gene annotation are also provided. For genes with no TIGR annotation, the closest ortholog annotation is designated.

| Gene                                                                         | Forward Primer (5'-3')        | Reverse Primer (5'-3')            | Use       |
|------------------------------------------------------------------------------|-------------------------------|-----------------------------------|-----------|
| LOC_Os01g57240<br>OsULTRAPETALA<br>(ULT1)                                    | CATCCACCGGTTTTCGGCATC         | ACGTCACCTCCACGAA<br>ATCCT         | ChIP qPCR |
| LOC_Os02g46930<br>OsJMJ707                                                   | TGAACAAATGAGGGACATAACC<br>CTT | CCA CTT TCT CAA AAT<br>CCG GAG CA | ChIP qPCR |
| LOC_Os03g56140<br>OsROUGH SHEATH1<br>(RS1)                                   | GTAAAAATGGTGGCGATG<br>CACC    | GTCGGATTCTTGCTAT<br>ATTCGGTT      | ChIP qPCR |
| LOC_Os03g51690<br>OsH1                                                       | AGTTAGCCAAGGAGATCACCC         | CTCCATGACTTGGTAT<br>TCTGTG        | ChIP PCR  |
| LOC_Os04g46440<br>OsERF34                                                    | CGCTTGACGTTTCAGATTTCTT        | CTAATACATGACGCCG<br>TGCAG         | ChIP qPCR |
| LOC_Os04g47870<br>OsAGO1b                                                    | AGTACAAAGCTTGGGGGGAC          | ATCTCTTGTCAGAATC<br>GGCG          | ChIP qPCR |
| LOC_Os05g11810<br>OsGA2 Oxidase 1<br>(OsGA2ox1)                              | TCTCGTCCCTCTACGTGCTT          | CCGATTACAACGGGAG<br>CTTA          | ChIP qPCR |
| LOC_Os06g06900<br>OsSPATULA (SPT)                                            | AGCATCCTCAAATCCAC GCA         | CTCGCAGTGGTTTCGT<br>GTATT         | ChIP qPCR |
| LOC_Os06g50340<br>OsFLORAL ORGAN<br>NUMBER1<br>(OsFON1)                      | GGTGGTGTGGATCTAGGG            | ACGAGACGAATCATGA<br>GCC           | ChIP PCR  |
| LOC_Os07g06620<br>OsYABBY1                                                   | CTACGTACAGTGGAATGG TCA<br>CA  | ACACTTGCTGCTGACC<br>TGGTT         | ChIP qPCR |
| LOC_Os07g25740<br>OsHEN4-like                                                | GGAAGCATACCACGAATA<br>ATTGCA  | AGCTCTGTGTATGGTG<br>TTCGA G       | ChIP qPCR |
| LOC_Os08g36920<br>OsERF104                                                   | GCATGCACCTTTTACCACTCC         | CGGAGCAGTCCATTAA<br>CACG          | ChIP qPCR |
| LOC_Os08g31980<br>Trehalose 6 phosphate<br>synthase<br>(OsTre-6-ph-synthase) | GTTCCCATTTCTCCCTCA TCGT       | TTTCGCGGATGTAACG<br>CGG           | ChIP qPCR |
| LOC_Os09g26999                                                               | GCGCCGTACTIONGATCAACATC       | AGCTTGCAATTAAGCA                  | ChIP qPCR |

|                                    |                            |                          |           |
|------------------------------------|----------------------------|--------------------------|-----------|
| OsDENSE and ERECT PANICLE1(OsDEP1) |                            | GATTGCC                  |           |
| LOC_Os09g35790 OsHSF24             | GACACTACCTCCTTTTCTAAGT AA  | TTCAGCCGGTTCAGAG CAGT    | ChIP qPCR |
| LOC_Os09g35790 OsHSF24 3'UTR       | CAGCAAATGGTGTTGTGATCCA C   | AGACTCCAATCCTCAT GCAGAG  | RT-qPCR   |
| LOC_Os04g46440 OsERF34 3'UTR       | GCCAAATCTAGCATGCGAGGTT     | TATCACACTGTCCATTT GGCCCA | RT-qPCR   |
| LOC_Os06g06900 OsSPATULA 3'UTR     | TGTTTAGTGAAGAGCAGCACG A    | GGACCACGAAGATTTT CTTAGT  | RT-qPCR   |
| LOC_Os05g29810 OsERF61             | CATGCATGCAGCAGCAAGATA TACA | GTTAAGCATTGCATTG CCAGGT  | RT-qPCR   |
| LOC_Os01g52680 OsMADS32/CFO        | CGCTTGACGTTTCAGATTTCT      | CTAATACATGACGCCG TGCAG   | RT-qPCR   |
| LOC_Os04g45330 OsYABBY5            | TAGGGTCCTGCATGTCTC         | ATACGATCGATGCATG CC      | RT-qPCR   |
| OSUBIQUITIN5                       | ACCACTTCGACCGCCACTACT      | ACGCCTAAGCCTGCTG GTT     | RT-qPCR   |

## Supplementary Methods

### Data set Preparation for Gene Association of OsMADS1 ChIP-seq Peaks:

A total of 4741 genes were queried from Chip-Seq data (PICS) and matched with both MSU (version 6.0) and RAPDB (build5). Common genes found in both data sets were again filtered using FDR cut-off  $\leq 0.055$ . We extended the search for the OsMADS1-bound sites up to -4kb upstream of the TSS and included only one bound site per gene. Finally we arrived at a data set of 3112 genes, each associated with a single OsMADS1-bound site.

### Calculations of A-Tract Motifs and Structural Features

Frequency of A-tracts: Three or more successive A:T base pairs devoid of TpA step defines an A-tract in the OsMADS1-bound sequences (Strahs and Schlick, 2000; McConnell and Beveridge, 2001; Stefl et al., 2004). The overall frequency of such A-tracts was calculated in a sliding window size of 6 nucleotides, and this was done for all three bound data sets (intergenic, gene body, and A-tract). The frequencies were compared to those in the respective shuffled sequences.

AFE calculation: AFE is a measure of overall stability of double helical DNA and is the summation of the free energy of its constituent base paired dinucleotides. The free energy values are taken from the unified parameters for the 10 unique dinucleotide steps obtained from melting studies of 108 oligo- and polynucleotide duplexes (SantaLucia, 1998). A 15 nucleotide sliding window (consists of 14 dinucleotide steps) was used for the AFE calculation (Kanhere and Bansal, 2005; Morey et al., 2011).

Bendability prediction: Bendability or flexibility was calculated for OsMADS1-bound sequences using trinucleotide parameters that predict DnaseI sensitivity (Brukner et al., 1995). An overlapping window of 30 nucleotides was used to measure the bendability as reported earlier (Kanhere and Bansal, 2005).

Curvature calculation: DNA can form a curved structure even in the absence of external factors, because of the intrinsic geometric properties of different dinucleotides. Curvature calculations were carried out using the in-house software NUCRADGEN (Bhattacharya and Bansal, 1988; Bansal et al., 1995) and BMHT model wedge angles, as defined based on gel retardation assays, were used (Bolshoy et al., 1991). The geometric measure  $d/l_{\max}$  was used to calculate curvature, where  $d$  is the end-to-end distance and  $l_{\max}$  is the total contour length. A 75 nucleotide moving window was used to calculate  $d/l_{\max}$ .

### **Enrichment of GO Functional Term:**

Functional categories of OsMADS1-bound genes (3112) were analysed using MapMan (Thimm et al., 2004). Differential gene expression data from *OsMADS1*RNAi (Khanday et al., 2013) were combined with Chip-Seq data from this study to extract bound and unbound, positively and negatively affected gene lists. Genes common to Chip-Seq data set and with >3 fold reduced expression in *OsMADS1* knockdown panicles (2-20mm) yielded a gene list of positively regulated by OsMADS1 in these developing florets. These 292 “positively regulated bound” data set were taken for GO categorization. Genes not present in the Chip-Seq data set but those that are positively regulated by OsMADS1, by differential expression studies, are categorized as “positively regulated unbound” data set (1740 genes) and were also taken for GO analysis. Similar categorization generated the “negatively regulated bound” data set of 360 genes and “negatively regulated unbound” data set of 3508 genes (Supplementary Fig. S5). We used PageMan application of MapMan to



evaluate statistically significant GO terms as per the hyper-geometric test. *P*-value was calculated from the *Z*-score value and color map was plotted using MATLAB. GO terms with *p*-value  $\leq 0.05$  were considered as significant. Child GO terms related to the parent RNA- regulation of transcription and to hormones of different functional categories were also plotted with their significance values. Results from MapMan analysis are presented in Supplemental data set S3.

### **Semi Quantitative ChIP- PCR**

Semi-quantitative PCR was performed to validate OsMADS1 binding on genes predicted by PICS algorithm. 25 ngs each of input chromatin, OsMADS1 immunoprecipitated chromatin and no antibody control (Mock) was used as template for a PCR of 40 cycles using primers listed in Supplementary Table S1. The PCR end products were analyzed on a 2% agarose gel and the ethidium bromide stained gel was imaged in a GelDoc XR System (Bio-Rad).

### **Literature Cited**

- Bansal M, Bhattacharyya D, Ravi B** (1995) NUPARM and NUCGEN: software for analysis and generation of sequence dependent nucleic acid structures. *Comput Appl Biosci* **11**: 281-287
- Bhattacharya D, Bansal M** (1988) A general procedure for generation of curved DNA molecules. *J Biomol Struct Dyn* **6**: 93-104
- Bolshoy A, McNamara P, Harrington RE, Trifonov EN** (1991) Curved DNA without A-A: experimental estimation of all 16 DNA wedge angles. *Proc Natl Acad Sci U S A* **88**: 2312-2316
- Brukner I, Sanchez R, Suck D, Pongor S** (1995) Sequence-dependent bending propensity of DNA as revealed by DNase I: parameters for trinucleotides. *EMBO J* **14**: 1812-1818
- Kanhere A, Bansal M** (2005) Structural properties of promoters: similarities and differences between prokaryotes and eukaryotes. *Nucleic Acids Res* **33**: 3165-3175
- McConnell KJ, Beveridge DL** (2001) Molecular dynamics simulations of B'-DNA: sequence effects on A-tract-induced bending and flexibility. *J Mol Biol* **314**: 23-40
- Morey C, Mookherjee S, Rajasekaran G, Bansal M** (2011) DNA free energy-based promoter prediction and comparative analysis of Arabidopsis and rice genomes. *Plant Physiol* **156**: 1300-1315
- SantaLucia J, Jr.** (1998) A unified view of polymer, dumbbell, and oligonucleotide DNA nearest-neighbor thermodynamics. *Proc Natl Acad Sci U S A* **95**: 1460-1465
- Steffl R, Wu H, Ravindranathan S, Sklenar V, Feigon J** (2004) DNA A-tract bending in three dimensions: solving the dA4T4 vs. dT4A4 conundrum. *Proc Natl Acad Sci U S A* **101**: 1177-1182
- Strahs D, Schlick T** (2000) A-Tract bending: insights into experimental structures by computational models. *J Mol Biol* **301**: 643-663
- Thimm O, Öbläsing O, Gibon Y, Nagel A, Meyer S, Krüger P, Selbig J, Müller LA, Rhee SY and Stitt M** (2004) MAPMAN: a user-driven tool to display

genomics data sets onto diagrams of metabolic pathways and other biological processes. *Plant J* **37**: 914-939
